# Supplementary material for: Elucidation of the Application of Blood Test Biomarkers to Predict Immune-Related Adverse Events in Atezolizumab-Treated NSCLC Patients Using Machine Learning Methods
Source: PubMed Central journal article supplement (PMC9284319; doi:10.3389/fimmu.2022.862752), 2022-06-30

- Comparison of linear and non-linear prediction models

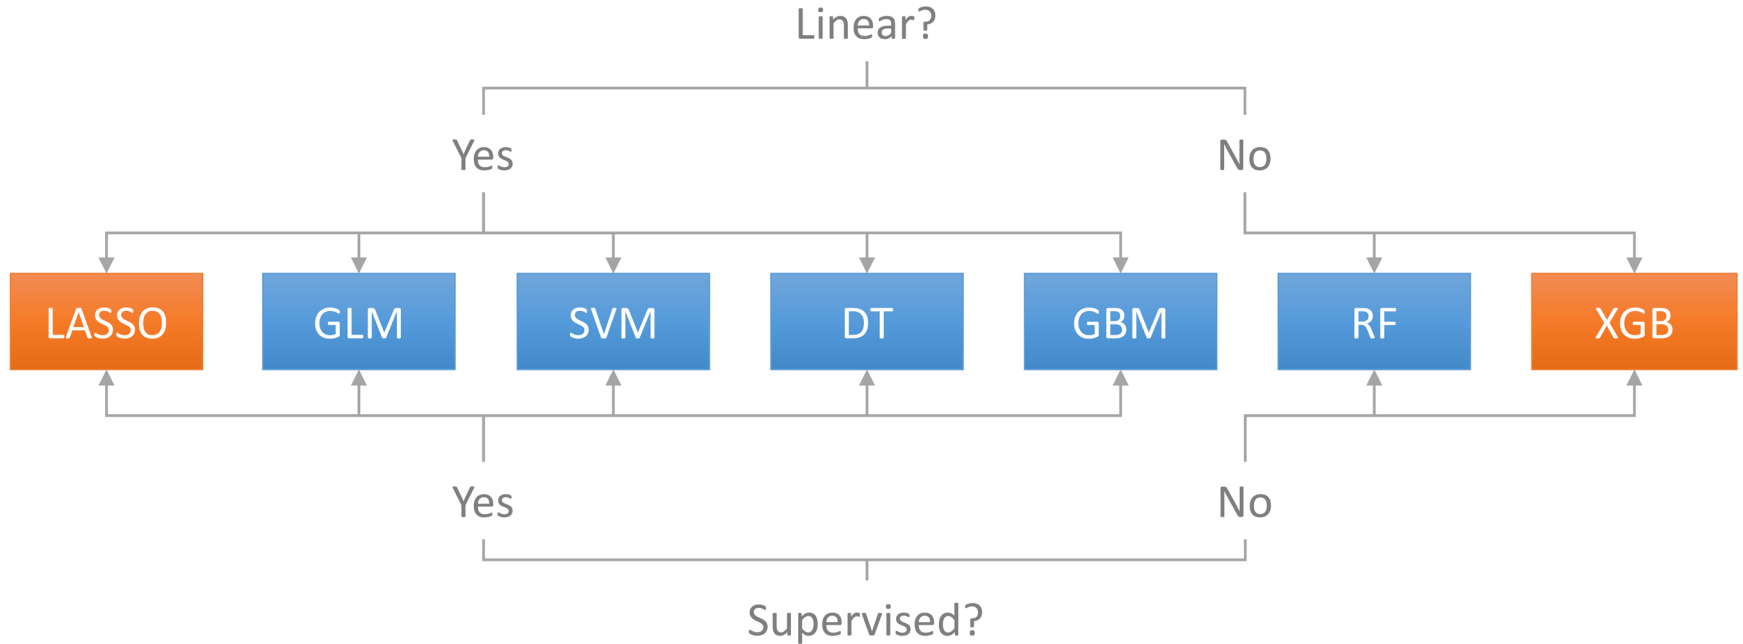

Supplement: DataSheet_1.pdf [file DataSheet_1.pdf]
